# Supplementary material for: Low modeled ozone production suggests underestimation of precursor emissions (especially NO x ) in Europe
Source: Copernicus journal article supplement (doi:10.5194/acp-2017-713), 2017-08-11
Supplement: Supplementary file 1 [file acp-2017-713-supplement.pdf]

**Table S1.** Summary of WRF parameterizations (<http://wrf-model.org>).

| <b>Parameter</b>                 | <b>Option</b>                                                                                                                                          |
|----------------------------------|--------------------------------------------------------------------------------------------------------------------------------------------------------|
| Microphysics                     | WRF Single-Moment 5-class (WSM5).                                                                                                                      |
| Longwave and Shortwave Radiation | Rapid Radiative Transfer Model for general circulation models (RRTMG).                                                                                 |
| Surface Layer                    | Revised version of the fifth generation Pennsylvania State University–National Center for Atmospheric Research Mesoscale Model (MM5) parameterization. |
| Land Surface                     | Noah land surface model (LSM).                                                                                                                         |
| PBL                              | Yonsei University non-local closure scheme (YSU).                                                                                                      |
| Cumulus Parameterization         | Kain-Fritsch.                                                                                                                                          |
| Dynamics & FDDA                  | Recommendations of WRF user’s guide.                                                                                                                   |

**Table S2.** Description of SNAP source categories in TNO-MACC-III (as in Kuenen et al., 2014).

| <b>SNAP</b> | <b>SNAP sector description</b>              |
|-------------|---------------------------------------------|
| 1           | Energy industries                           |
| 2           | Non-industrial combustion                   |
| 34          | Industry (combustion and processes)         |
| 5           | Extraction and distribution of fossil fuels |
| 6           | Product use                                 |
| 7           | Road transport                              |
| 8           | Non-road transport and other mobile sources |
| 9           | Waste treatment                             |
| 10          | Agriculture                                 |

**Table S3.** Overview of ozonesonde stations.

| <b>Station</b>   | <b>Longitude (deg)</b> | <b>Latitude (deg)</b> | <b>Elevation (m)</b> | <b>Daily Records</b> | <b>UTC time</b> |
|------------------|------------------------|-----------------------|----------------------|----------------------|-----------------|
| Valentia         | 10.25 W                | 51.93 N               | 14                   | 7                    | 11:00–12:00     |
| Barajas          | 3.58 W                 | 40.47 N               | 631                  | 12                   | 10:00–11:00     |
| Legionowo        | 20.97 E                | 52.40 N               | 96                   | 9                    | 11:00–12:00     |
| Hohenpeissenberg | 11.00 E                | 47.80 N               | 976                  | 25                   | 04:00–06:00     |
| Payerne          | 6.57 E                 | 46.49 N               | 491                  | 36                   | 11:00–12:00     |
| Uccle            | 4.35 E                 | 50.80 N               | 100                  | 40                   | 11:00–12:00     |

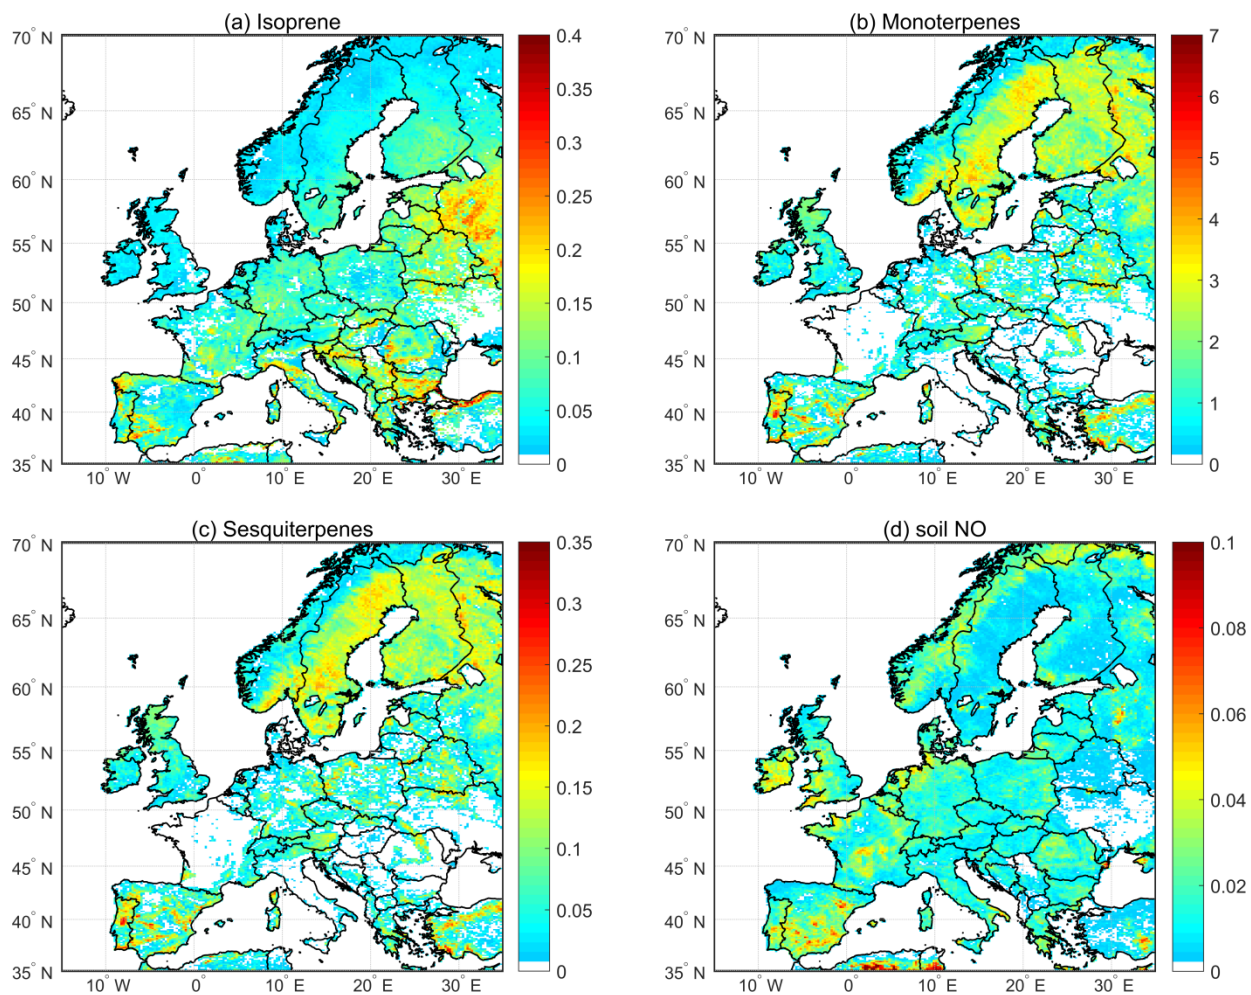

**Figure S1.** Spatial distributions of total (a) isoprene, (b) monoterpene, (c) sesquiterpene and (d) soil NO emissions ( $\text{t km}^{-2}$ ) in Europe for the summer of 2010.

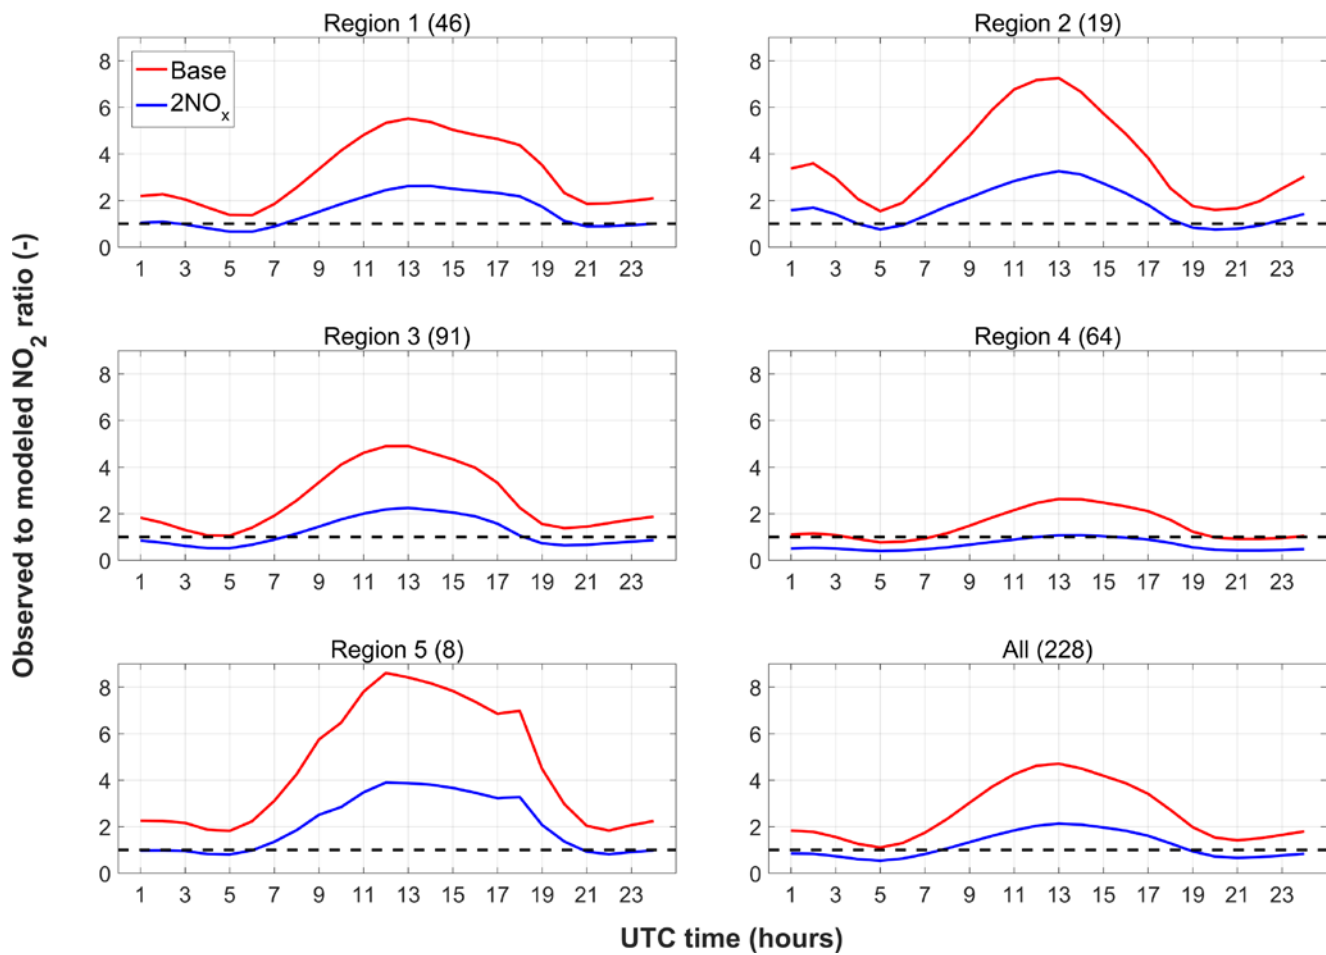

**Figure S2.** Diurnal profile of the ratio of observed to modeled surface  $\text{NO}_2$  mixing ratios for Regions 1–5 as well as for the whole domain (All) in summer 2010. The number of stations available for each region is reported in parentheses at the top of each panel. The dashed black line is the ratio of 1. Red line shows the base case, blue line shows the scenario with doubled  $\text{NO}_x$  emissions ( $2\text{NO}_x$ ).

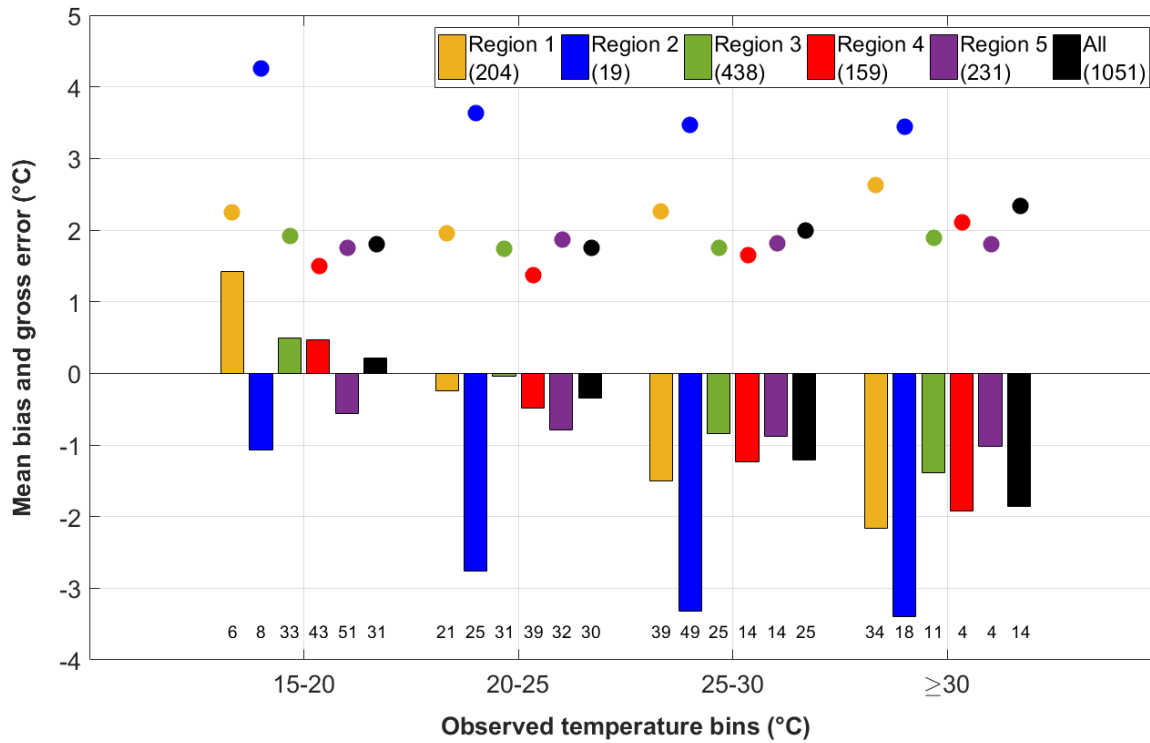

**Figure S3.** Temperature (2 m) mean bias (bars) and gross error (dots) for observed afternoon temperature bins for each region in Europe for the summer of 2010. Values below the bars indicate the fraction (%) of the values assigned to each bin for each region. The number of stations available for each region is reported in parentheses in the legend.

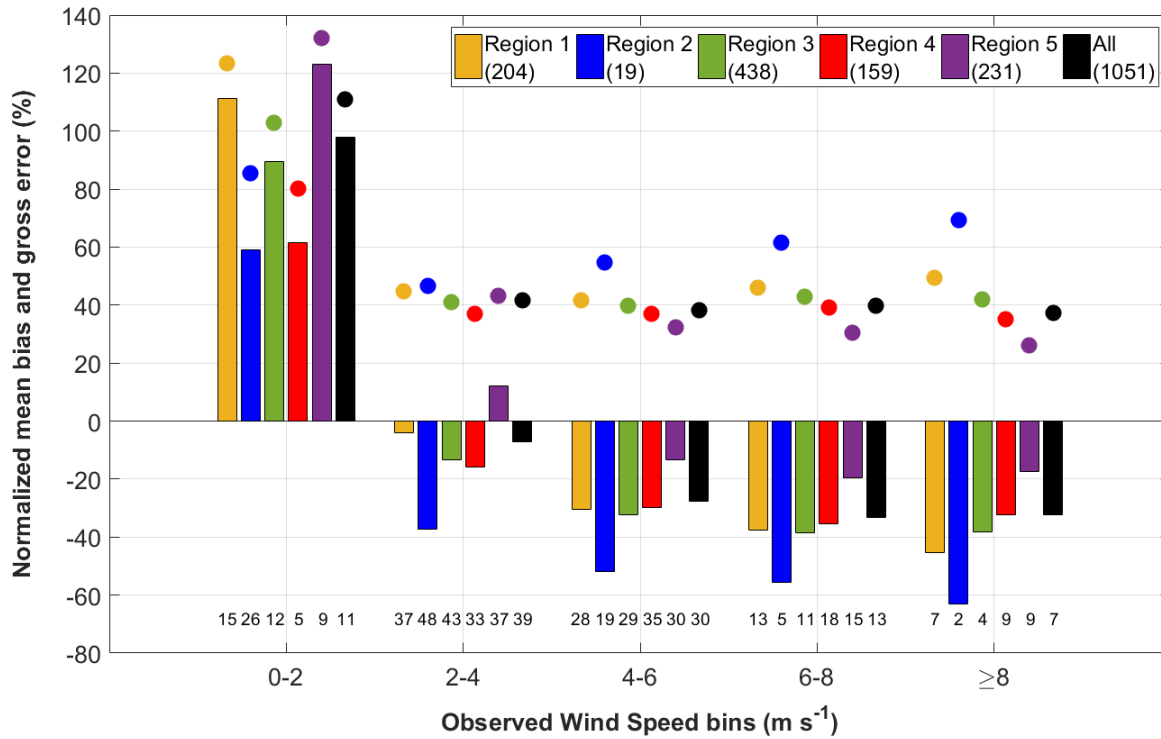

**Figure S4.** Wind speed (10 m) normalized mean bias (bars) and gross error (dots) for observed afternoon wind speed bins for each region in Europe for the summer of 2010. Values below the bars indicate the fraction (%) of the values assigned to each bin for each region. The number of stations available for each region is reported in parentheses in the legend.

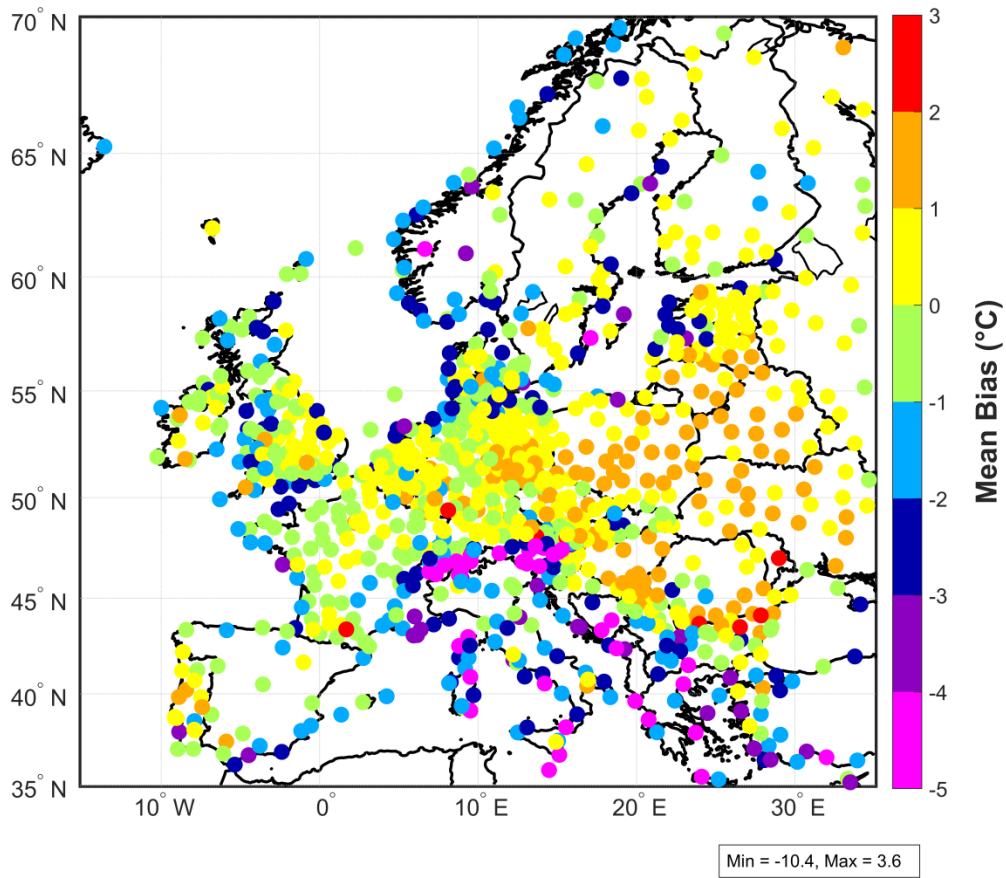

**Figure S5.** Temperature (2 m) afternoon mean bias for each station in Europe for the summer of 2010. There are 18 stations outside the color scale.

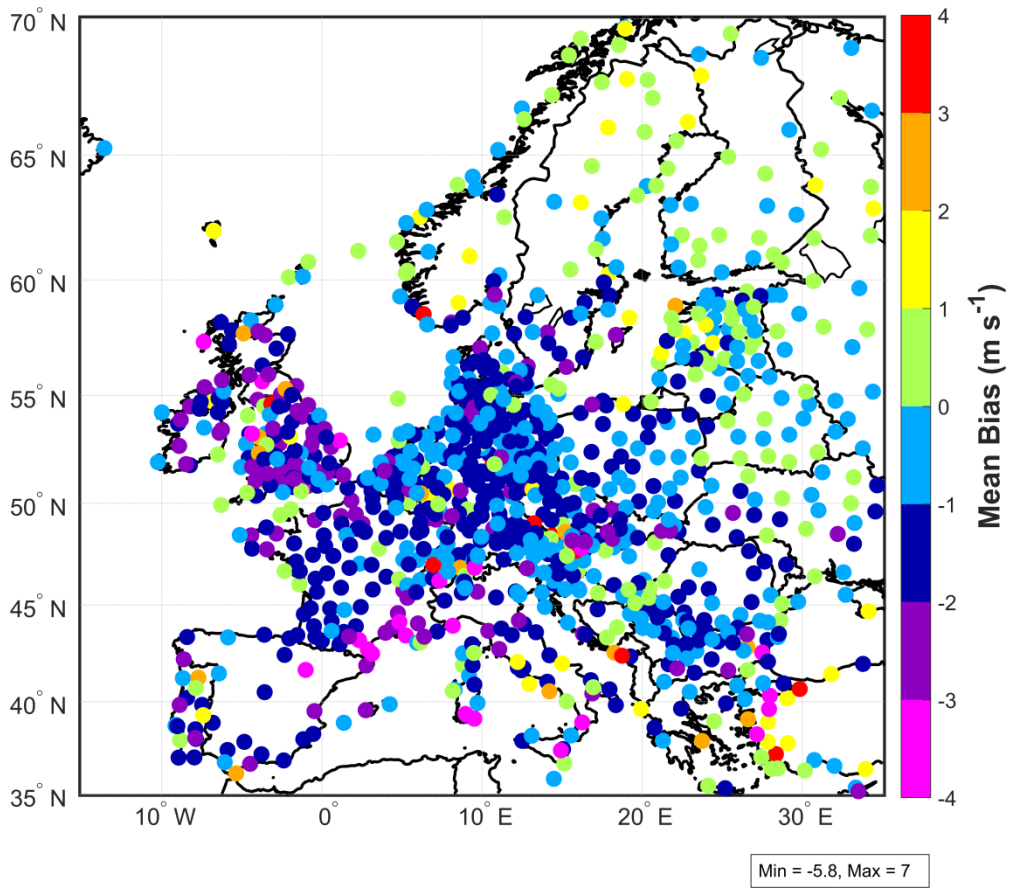

**Figure S6.** Wind speed (10 m) afternoon mean bias for each station in Europe for the summer of 2010. There are 8 stations outside the color scale.



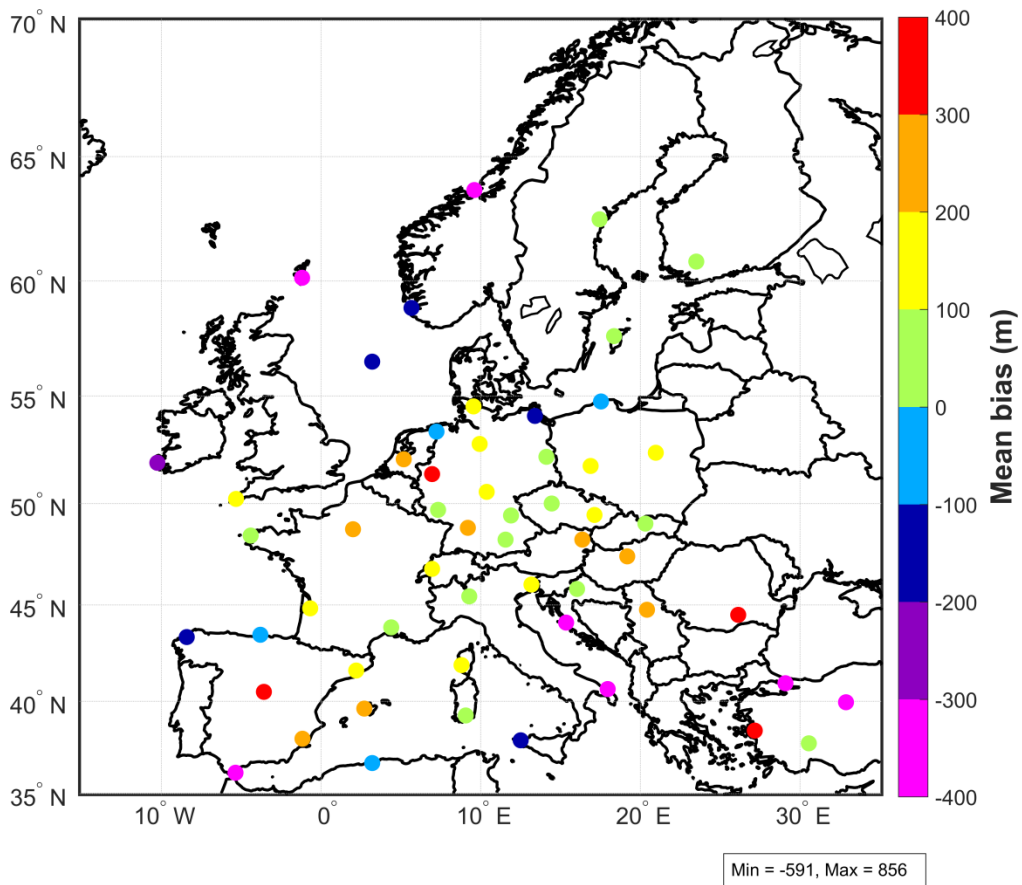

**Figure S7.** PBLH mean bias at 12 UTC for each station in Europe for the summer of 2010. There are 5 stations outside the color scale.

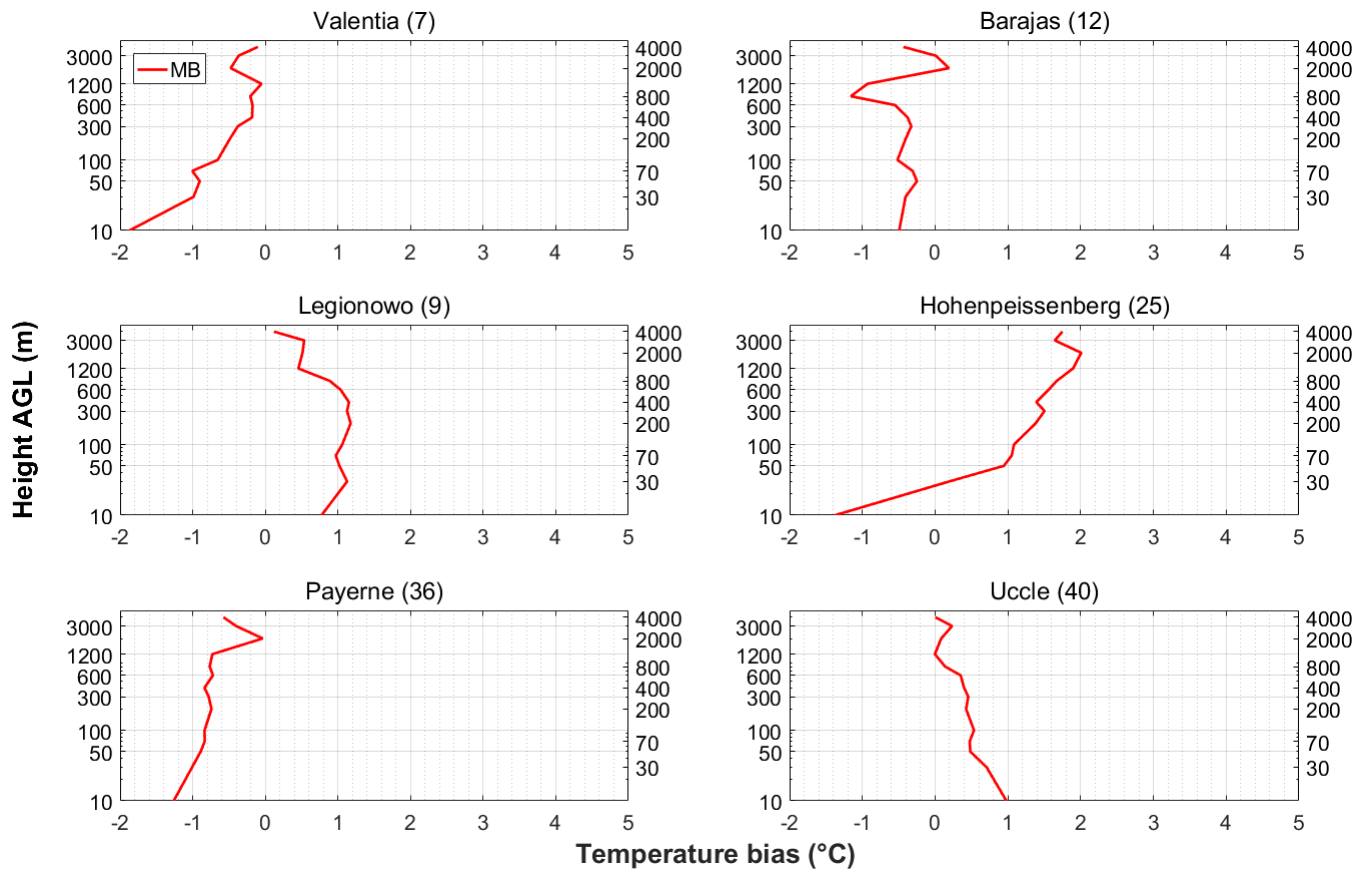

**Figure S8.** Vertical profiles of temperature mean bias for 6 stations for the summer of 2010. The number of ozonesondes available for each station is reported in parentheses at the top of each panel. Heights of 14 model layers are shown on both y-axes which are in logarithmic scale.

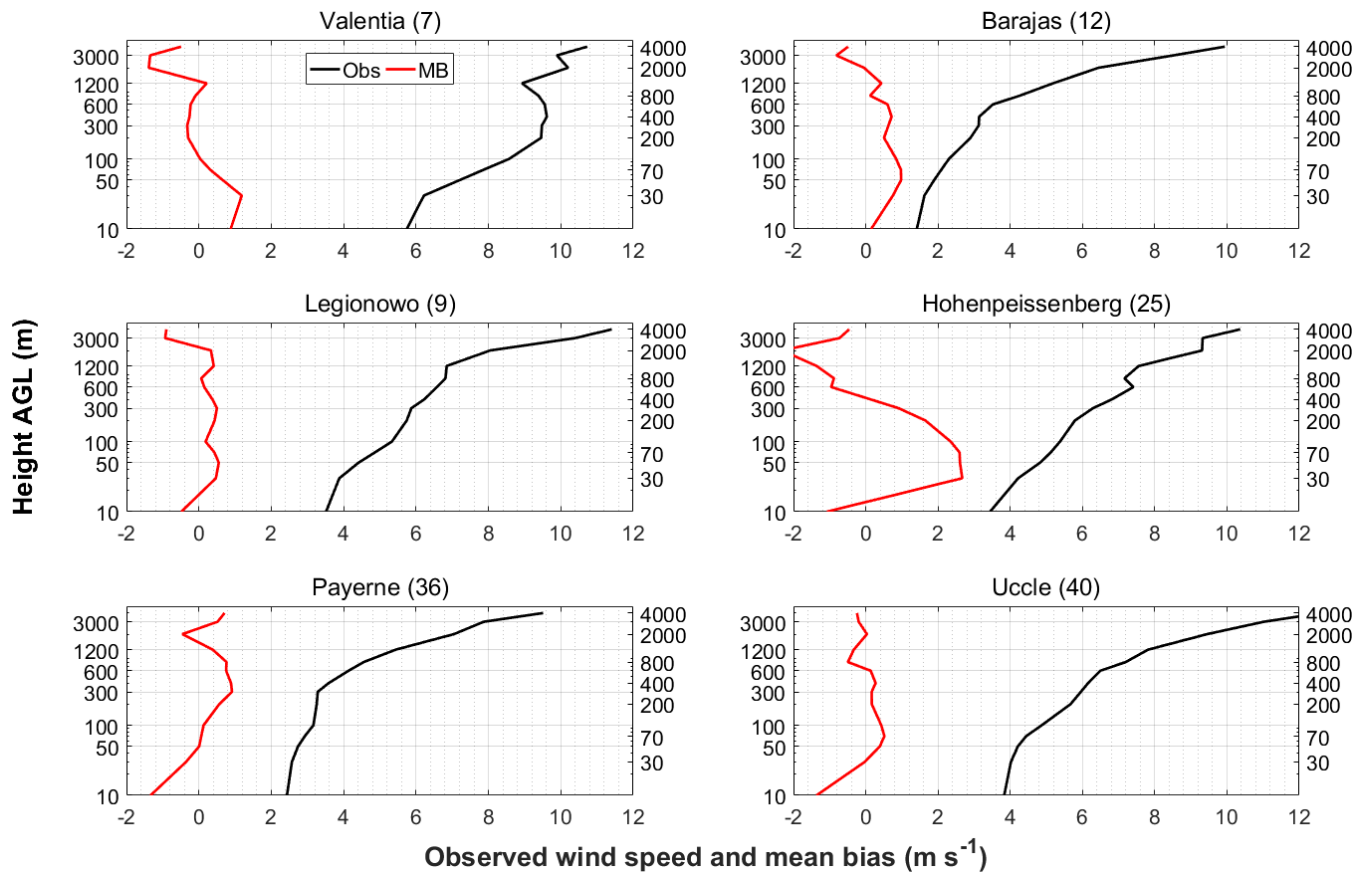

**Figure S9.** Vertical profiles of observed wind speed and mean bias for 6 stations for the summer of 2010. The number of ozonesondes available for each station is reported in parentheses at the top of each panel. Heights of 14 model layers are shown on both y-axes which are in logarithmic scale.

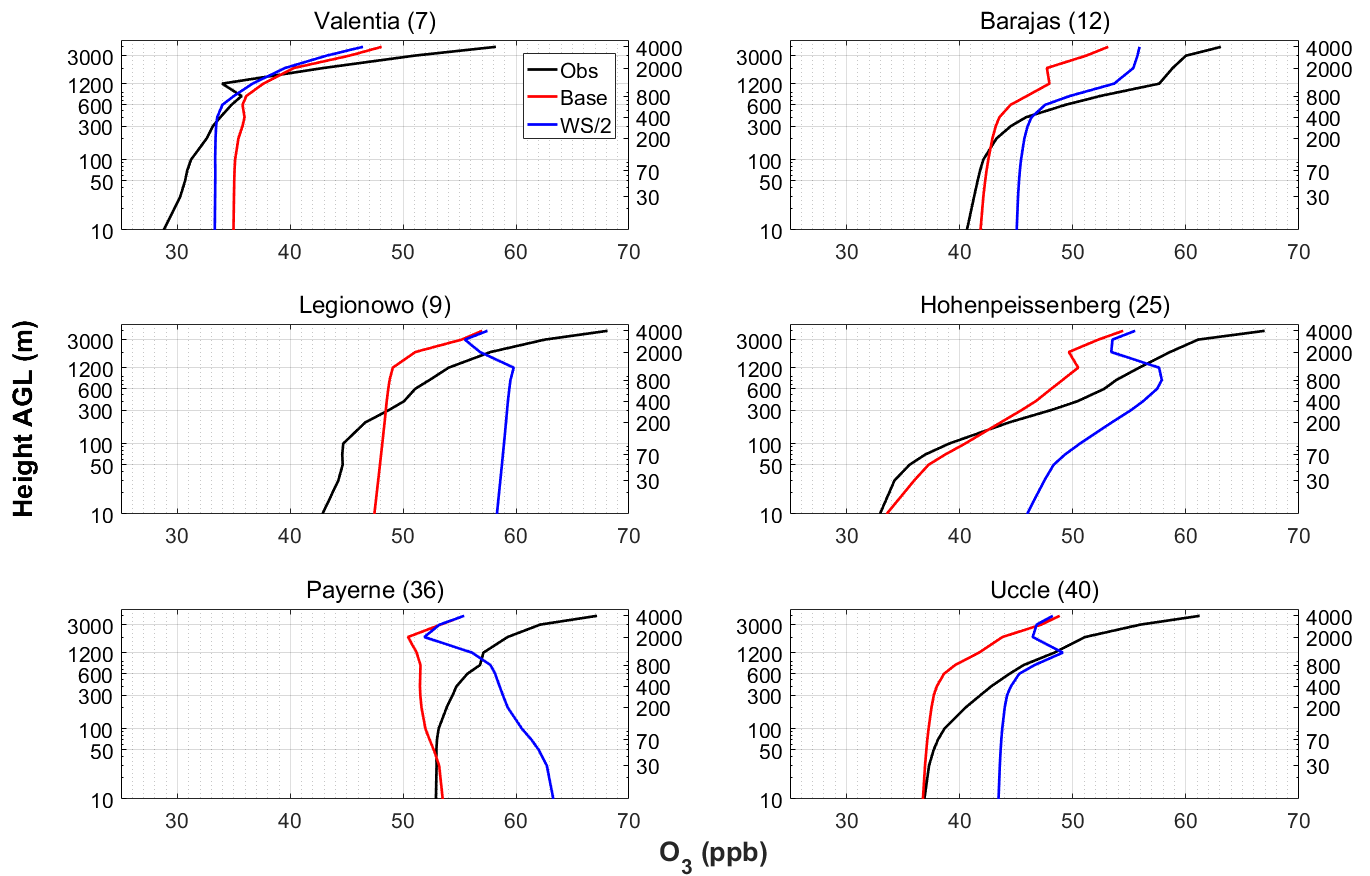

**Figure S10.** Observed and modeled O<sub>3</sub> mixing ratio vertical profiles for 6 stations for the summer of 2010. The number of ozonesondes available for each station is reported in parentheses at the top of each panel. Heights of 14 model layers are shown on both y-axes which are in logarithmic scale.

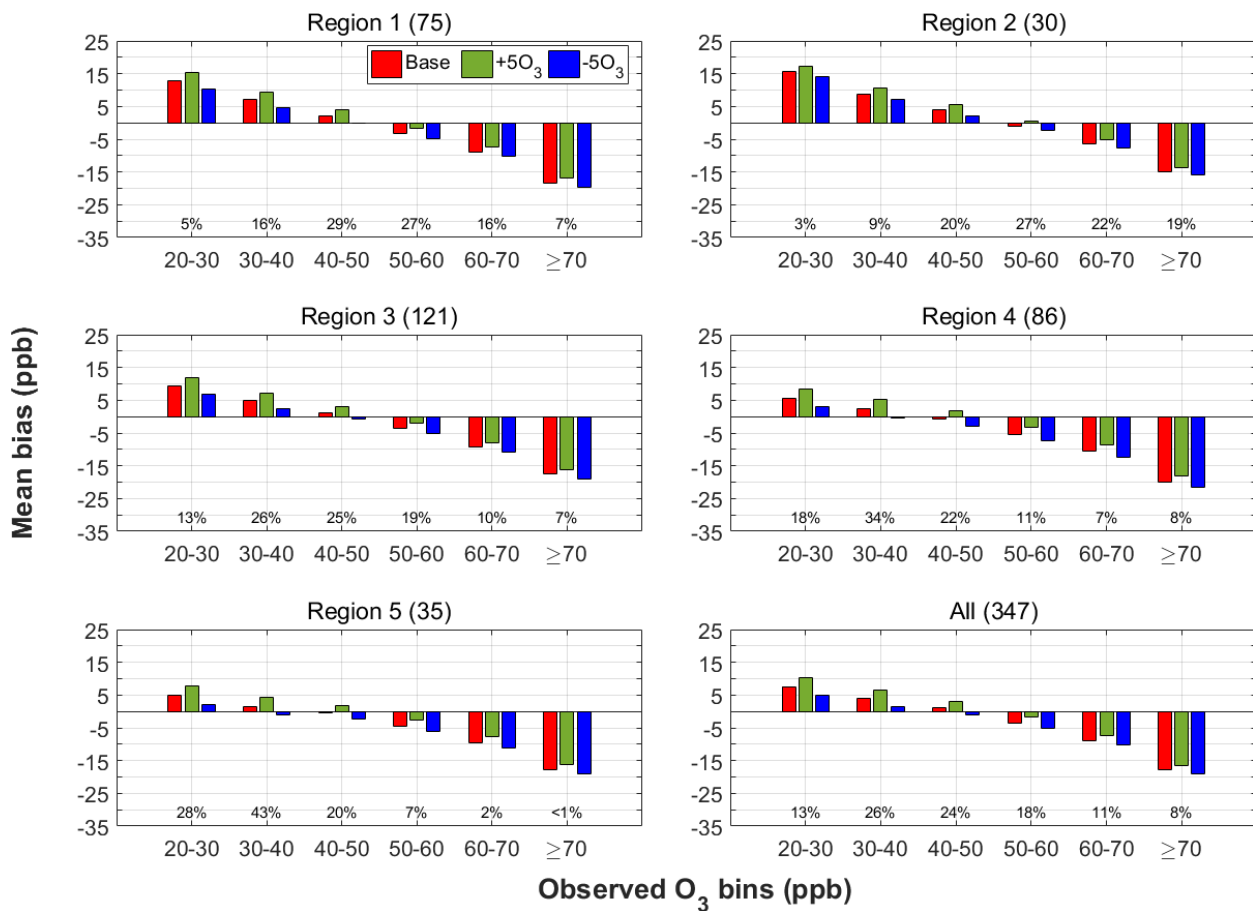

**Figure S11.** Mean bias of the afternoon surface O<sub>3</sub> mixing ratio for each bin of observed surface O<sub>3</sub> mixing ratios for various O<sub>3</sub> ICBC scenarios in summer 2010. Percentage values below the bars indicate the fraction of the values assigned to each bin for each region. The number of stations available for each region is reported in parentheses at the top of each panel.
